# Supplementary material for: Small sized Fe–Co sulfide nanoclusters anchored on carbon for oxygen evolution
Source: Royal Society of Chemistry journal article supplement (doi:10.1039/c9ta03825f), 2019-01-01
Supplement: c9ta03825f1.pdf [file c9ta03825f1.pdf]

## Supporting Information for

### Small Sized Fe-Co Sulfide Nanoclusters Anchored on Carbon for Oxygen Evolution

*Yuanjun Liu,<sup>a</sup> Xulan Xie,<sup>b</sup> Guoxing Zhu,<sup>b,\*</sup> Yu Mao,<sup>c</sup> Yinan Yu,<sup>b</sup> Suxiao Ju,<sup>a</sup> Xiaoping  
Shen<sup>b,\*</sup> Huan Pang<sup>d</sup>*

<sup>a</sup>School of Environmental and Chemical Engineering, Jiangsu University of Science  
and Technology, Zhenjiang 202018, China

<sup>b</sup>School of Chemistry and Chemical Engineering, Jiangsu University, Zhenjiang  
212013, China

E-mail: [zhuguoxing@ujs.edu.cn](mailto:zhuguoxing@ujs.edu.cn); [xiaopingshen@ujs.edu.cn](mailto:xiaopingshen@ujs.edu.cn)

<sup>c</sup>School of Chemistry and Chemical Engineering, University of South China,  
Hengyang, 421001, China

<sup>d</sup>College of Chemistry and Chemical Engineering, Yangzhou University, Yangzhou,  
225009, China

## Details of Calculation Methods.

Because the obtained cobalt sulfide was comprised by  $\text{Co}_9\text{S}_8$  with cubic crystal structure, a  $\text{Co}_9\text{S}_8$  unit cell (cell formula:  $\text{Co}_{36}\text{S}_{32}$ , cubic Fm-3m,  $a = 9.923 \text{ \AA}$ ) was employed in this calculation study. The (111) facet of  $\text{Co}_9\text{S}_8$  was chosen as the model surface for the subsequent calculation (Figure SI-1). The Brillouin zone was sampled with a  $k$ -point mesh of  $3 \times 3 \times 1$  for  $\text{Co}_9\text{S}_8$  (111) surface; and a vacuum layer of  $12 \text{ \AA}$  was applied. Upper half of substrate layers and adsorbates are fully relaxed while the lower half of substrate layers are fixed. Bader analysis was carried out to evaluate the charges of each atoms in the system. Because the obtained cobalt sulfide was comprised by  $\text{Co}_9\text{S}_8$  with cubic crystal structure, a  $\text{Co}_9\text{S}_8$  unit cell (cell formula:  $\text{Co}_{36}\text{S}_{32}$ , cubic Fm-3m,  $a = 9.923 \text{ \AA}$ ) was employed in this work (Figure SI-1a). The (111) facet of  $\text{Co}_9\text{S}_8$  (with the lowest surface energy and has been observed experimentally to be preferentially exposed) was chosen as the model surface for the subsequent calculation (Figure SI-1b, c).<sup>1,2</sup>

The cell formula of  $\text{Co}_9\text{S}_8$  (111) facet is  $\text{Co}_{18}\text{S}_{16}$ ; while the formula of  $\text{Fe}_6\text{Co}_{12}\text{S}_{16}$  is selected as the model for  $c\text{-FeCo}_2\text{S}_y$  product. Randomly selected 520 structures of the total 18564 possible  $\text{Fe}_6\text{Co}_{12}\text{S}_{16}$  structures (18C6) were optimized. The energy distribution of the random 520 structures is shown in Figure SI-2. The result is close to a standard normal distribution. Thus, the randomly selected 520 structures can represent all of the 18564 different  $\text{Fe}_6\text{Co}_{12}\text{S}_{16}$  structures. The most stable three  $\text{Fe}_6\text{Co}_{12}\text{S}_{16}$  structures were chosen for the following calculations (Figure SI-14).

For the calculation of  $\text{H}_2\text{O}$  absorption energy on the surface, the convergence threshold was set as  $10^{-5} \text{ eV}$  in energy and  $0.05 \text{ eV \AA}^{-1}$  in force. The adsorption energy of X is defined as:

$$(1) \quad E_{\text{ad}}^{\text{X}} = E(\text{X/substrate}) - E(\text{substrate}) - E(\text{X})$$

where  $E(\text{X/substrate})$ ,  $E(\text{substrate})$ , and  $E(\text{X})$  are the energies of X adsorbed on the substrate, the substrate, and X in the gas phase, respectively. The more negative of

$E_{ad}^X$  is, the more strongly the species binds with the substrate.

### Calculation of the Gibbs free energies and theoretical overpotential based on a single-site mechanism

The thermodynamic potential for the oxidation of water to produce oxygen,  $2H_2O \rightarrow O_2 + 4H^+ + 4e^-$ , is 1.23 V at standard conditions. In our case the OER is operated in alkaline conditions. The elementary steps can be written as follows<sup>3,4</sup>:

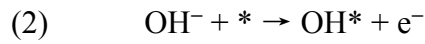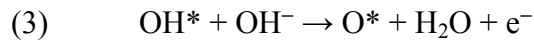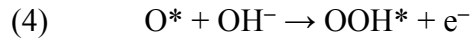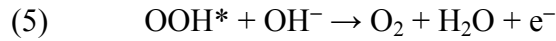

where \* denotes the active sites. The Gibbs free energy change for steps (2-5) can be expressed as:

$$(6) \quad \Delta G_1 = \Delta G_{OH} - eU + \Delta G_{H^+}(pH)$$

$$(7) \quad \Delta G_2 = \Delta G_O - \Delta G_{OH} - eU + \Delta G_{H^+}(pH)$$

$$(8) \quad \Delta G_3 = \Delta G_{OOH} - \Delta G_O - eU + \Delta G_{H^+}(pH)$$

$$(9) \quad \Delta G_4 = 4.92 - \Delta G_{OOH} - eU + \Delta G_{H^+}(pH)$$

Where  $U$  is the potential measured against normal hydrogen electrode (NHE) at standard conditions. The free energy change of the protons relative to the above specified electrode at non-zero pH (in our cases, pH = 13.6) is represented by Nernst equation as:

$$(10) \quad \Delta G_{H^+}(pH) = -k_B T \ln(10) \times pH$$

The sum of  $\Delta G_{1-4}$  is fixed to the negative of experimental Gibbs free energy that is involved for the formation of two water molecules ( $1.23 \times 4 = 4.92$  eV). The Gibbs free energy differences of these intermediates include zero-point energy (ZPE),

thermal energy and entropy derived from partition functions <sup>5, 6</sup>. The ZPE correction is given by:

$$(11) \quad E_{ZPE} = \sum_i \frac{h\nu_i}{2}$$

where  $h$  is Plank's constant,  $\nu_i$  is vibration frequency calculated based on the harmonic oscillator approximation. The standard molar vibrational thermal energy contribution is calculated by:

$$(12) \quad U_{vib} = RT \sum_i \frac{h\nu_i/k_B}{e^{h\nu_i/k_B T} - 1}$$

where  $R$  is the gas constant,  $k_B$  is Boltzmann's constant. The standard molar vibration entropy is calculated by using the following expression:

$$(13) \quad S_{vib} = R \sum_i \left[ \frac{h\nu_i/k_B T}{e^{h\nu_i/k_B T} - 1} - \ln(1 - e^{-h\nu_i/k_B T}) \right]$$

Therefore, the standard molar Gibbs free energies are obtained by:

$$(14) \quad G = E_{total} + E_{ZPE} + U - TS$$

$$(15) \quad \Delta G = \Delta E_{total} + \Delta(E_{ZPE} + U - TS)$$

where  $E_{total}$  refers to the total energy obtained from DFT calculation. The energy difference  $\Delta E$  is calculated relative to  $H_2O$  and  $O_2$ :

$$(16) \quad \Delta E_{OH} = E_{OH} - E_{Surface} - (E_{H_2O} - 1/2 E_{H_2})$$

$$(17) \quad \Delta E_O = E_O - E_{Surface} - (E_{H_2O} - E_{H_2})$$

$$(18) \quad \Delta E_{OOH} = E_{OOH} - E_{Surface} - (2 * E_{H_2O} - 3/2 E_{H_2})$$

After obtaining all  $\Delta G$  via above equations, the theoretical overpotential is then readily defined as the value that the maximum of  $\{\Delta G_1, \Delta G_2, \Delta G_3, \Delta G_4$  (divided by  $e$ )} minus 1.23 V.

## Details for the derivation of the theoretical Tafel slope based on a two-site mechanism

Let us assume the following two-site mechanism:

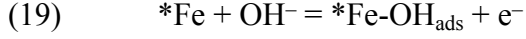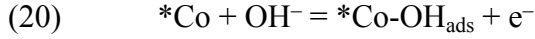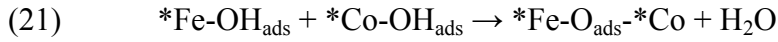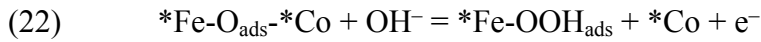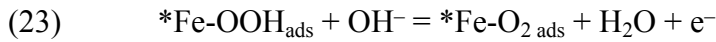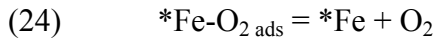

in which “\*Fe” and “\*Co” denote metal oxide/oxyhydroxide sites at the surface. In the case when step (21) represents the rate-determining step (RDS), the total rate of the reaction is given as:

$$(25) \quad j = 4 \times F \times k_3 \times \theta_{OH, Fe} \times \theta_{OH, Co}$$

where  $k_i$  is the rate constant of step (i) in the forward (+) or backward (–) direction,  $\theta$  is the fractional occupancy of the intermediates on surface Fe or Co sites. By applying a formal kinetic approach, the theoretical Tafel slope for this scenario was then calculated. Assuming that the steps preceding the RDS (steps 19 and 20) are in quasi-equilibrium at low overpotentials/current densities, we obtain the following equations:

$$(26) \quad k_1 c_{OH} (1 - \theta_{OH, Fe}) e^{\frac{RT}{(1-\beta)FE}} = k_{-1} \theta_{OH, Fe} e^{\frac{RT}{-\beta FE}}$$

$$(27) \quad k_2 c_{OH} (1 - \theta_{OH, Co}) e^{\frac{RT}{RT}} = k_{-2} \theta_{OH, Co} e^{\frac{RT}{RT}}$$

in which  $c_{OH}$  is the concentration of  $OH^-$  ions,  $\beta_i$  is the symmetry factor (we can assume that  $\beta_1 = \beta_2 = \beta_3 = \beta_4 = \beta = 0.5$ ),  $F$  is the Faraday constant,  $E$  is the potential,  $R$  is the universal gas constant, and  $T$  is the absolute temperature. Since  $\theta$  is close to 0 at low overpotentials/current densities, it can be approximated that  $(1 - \theta_{OH}) = 1$ . In that case we obtain:

$$(28) \quad \theta_{OH,Fe} = \frac{k_1}{k_{-1}} c_{OH} e^{\frac{FE}{RT}}$$

$$(29) \quad \theta_{OH,Co} = \frac{k_2}{k_{-2}} c_{OH} e^{\frac{FE}{RT}}$$

Now, by replacing  $\theta_{OH,Fe}$  and  $\theta_{OH,Co}$  in the rate law of the total reaction (Eq. 25),

$$(30) \quad j = 4 \times F \times k_3 \times \frac{k_1}{k_{-1}} \times \frac{k_2}{k_{-2}} \times c_{OH}^2 \times e^{\frac{3FE}{RT}}$$

For  $T = 298$  K, the theoretical Tafel slope expected on  $c\text{-FeCo}_x\text{S}_y/\text{carbon}$  in the low current density range is:

$$(31) \quad b = \frac{2.303RT}{2F} = 30 \text{ mV dec}^{-1}$$

This value is very close to the measured Tafel slope value of our obtained  $\text{FeCo}_2\text{S}_y/\text{carbon}$  product,  $35 \text{ mV dec}^{-1}$ . This result suggests that the step (21) that locates between the second and third electron transfer would be one possible RDS.

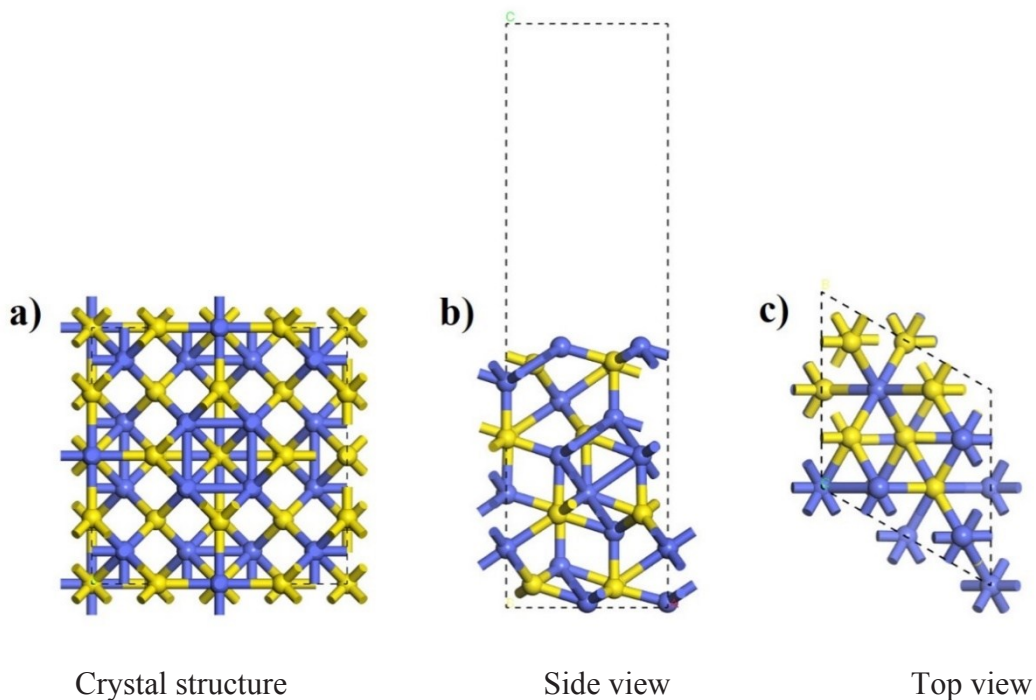

**Figure SI-1.** a) Crystal structure of  $\text{Co}_9\text{S}_8$  and b, c) the side or top views of the  $\text{Co}_9\text{S}_8$  (111) facet with the lowest surface energy.

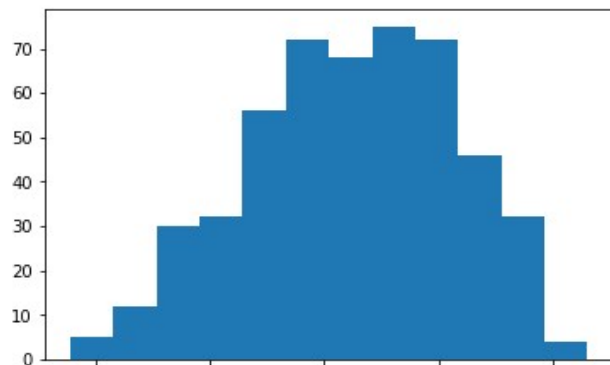

**Figure SI-2.** The energy distribution histogram of the 520 randomly selected  $\text{Fe}_6\text{Co}_{12}\text{S}_{16}$  structures.

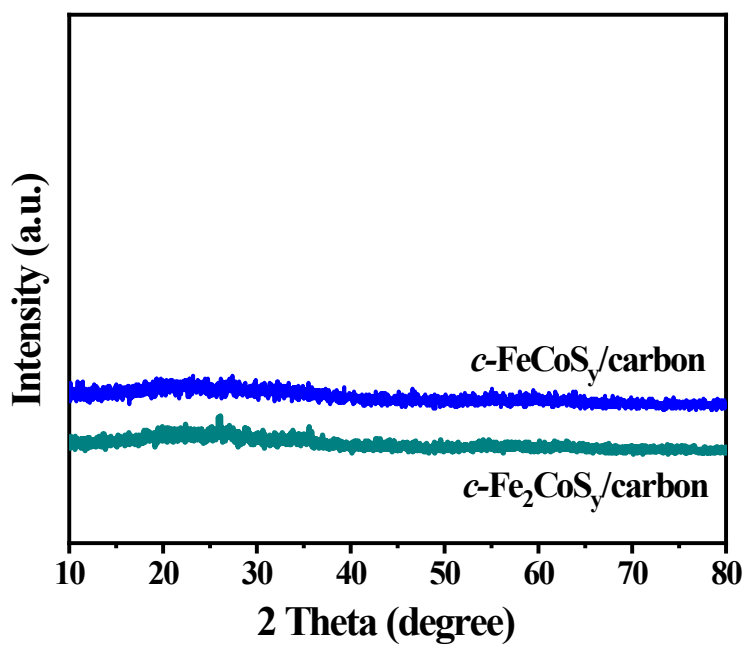

**Figure SI-3.** XRD patterns of  $c\text{-FeCoS}_y/\text{carbon}$  and  $c\text{-Fe}_2\text{CoS}_y/\text{carbon}$ .

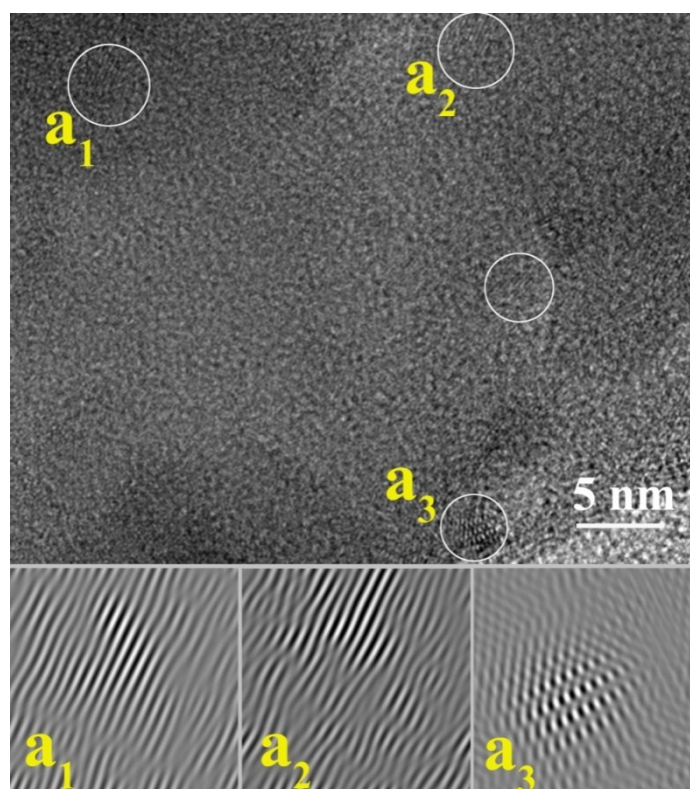

**Figure SI-4.** HRTEM image of the  $c\text{-FeCo}_2\text{S}_y/\text{carbon}$  product and the corresponding sharpen areas  $a_1$ - $a_3$ ).

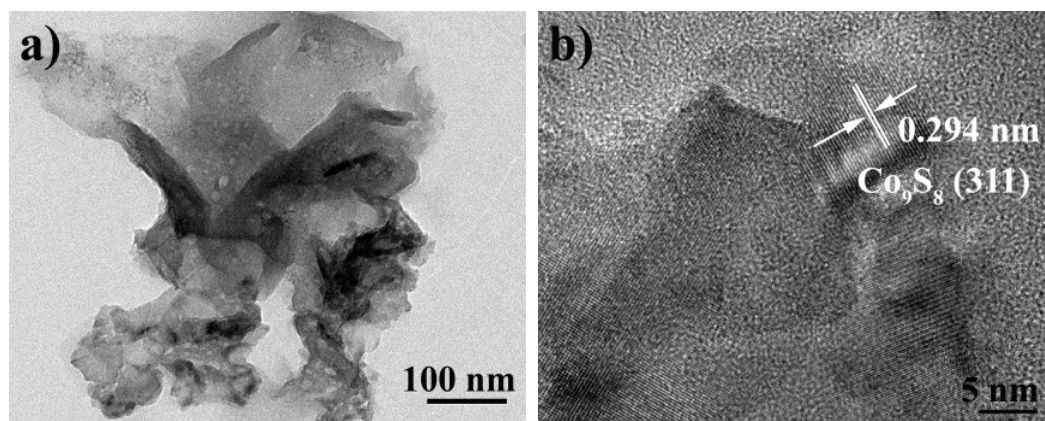

**Figure SI-5.** a) TEM and b) HRTEM images of  $\text{CoS}_y/\text{carbon}$  product.



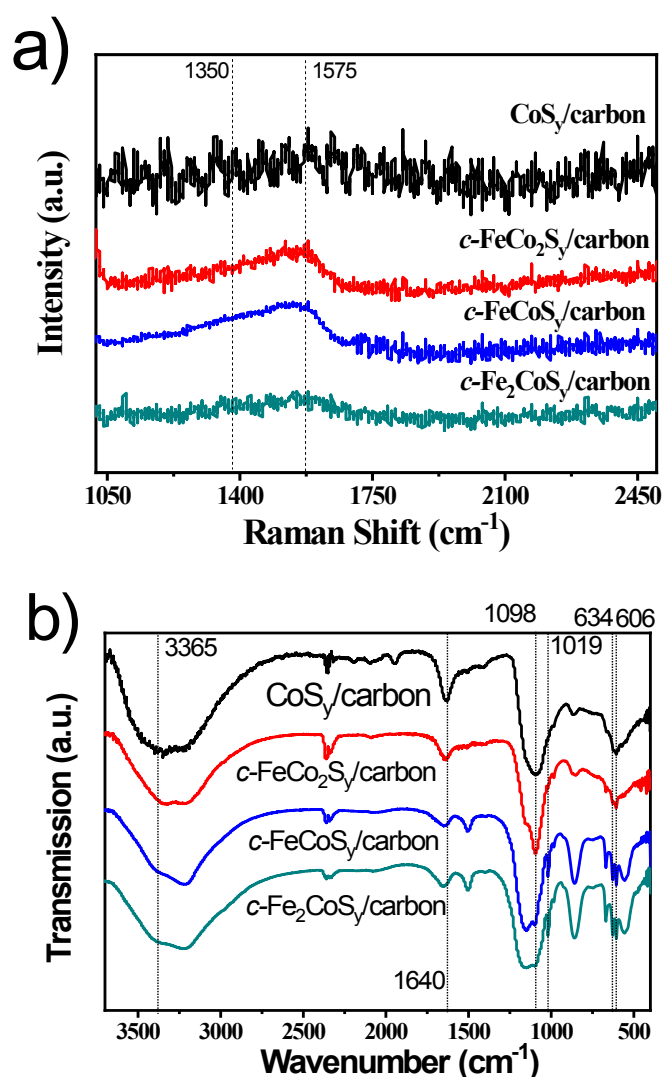

**Figure SI-6.** a) Raman spectra and b) FT-IR spectra of the obtained products.

In the spectrum, the peak centered at  $2380\text{ cm}^{-1}$  is caused by asymmetrical stretching vibration of  $\text{CO}_2$  that possibly comes from air. The peak at  $880\text{ cm}^{-1}$  can be corresponded to the species of C-H in C=C-H (bending vibration). The relatively wide band at  $1180\text{ cm}^{-1}$  indicates there are some C-O groups on the carbon materials (stretching vibration of C-O). In addition, the Fe-O species were also detected in the IR spectrum at wavenumber of  $550\text{ cm}^{-1}$  for the Fe-rich products ( $c\text{-FeCoS}_y/\text{carbon}$  and  $c\text{-Fe}_2\text{CoS}_y/\text{carbon}$ ), possibly due to the surface oxidation of sulfides in air.

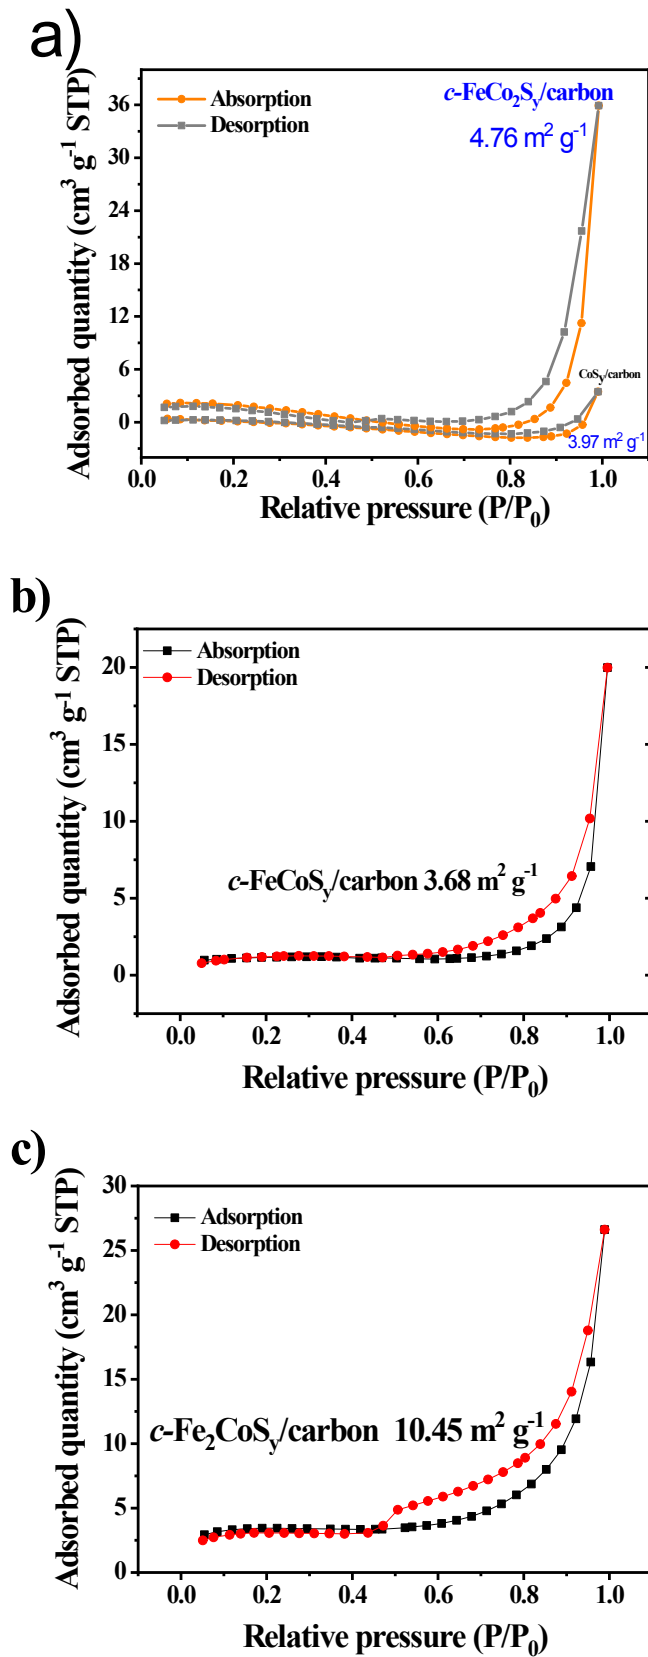

**Figure SI-7.**  $\text{N}_2$  adsorption-desorption isotherms for a)  $\text{CoS}_y/\text{carbon}$  and  $c\text{-FeCo}_2\text{S}_y/\text{carbon}$ , b)  $c\text{-FeCoS}_y/\text{carbon}$ , c)  $c\text{-Fe}_2\text{CoS}_y/\text{carbon}$ .

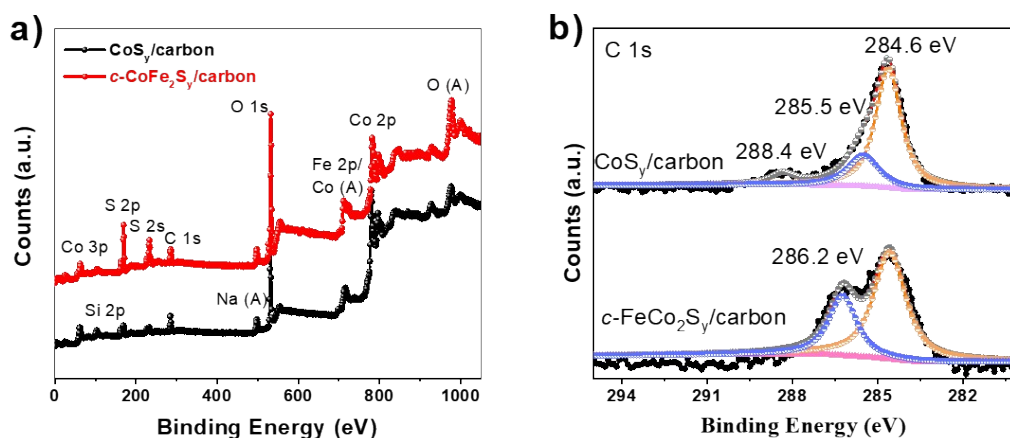

**Figure SI-8.** a) XPS survey and b) high-resolution *C 1s* spectra of the  $\text{CoS}_y/\text{carbon}$  and  $c\text{-FeCo}_2\text{S}_y/\text{carbon}$  products. The XPS survey spectra suggesting the presence of Fe, Co, S, C, O elements in the products. The Si 2p band would come from the substrate to load the sample for XPS test. The presence of Na is due to the inevitable residue from  $\text{Na}_2\text{SO}_4$  used for the synthesis.

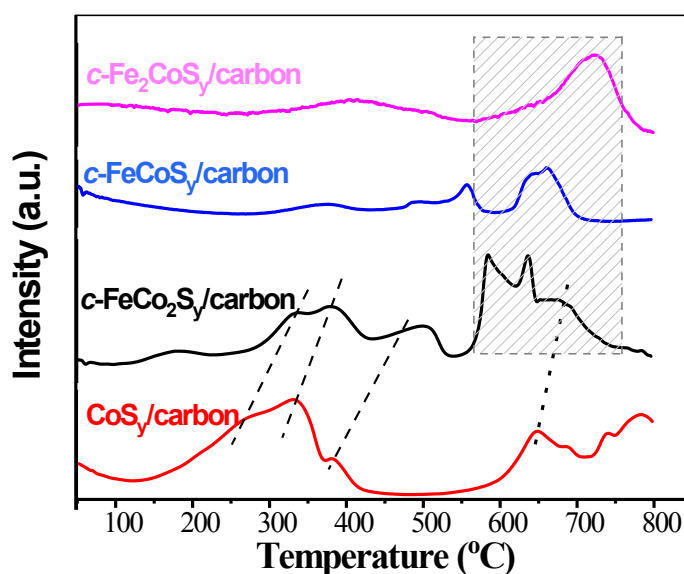

**Figure SI-9.**  $\text{H}_2$ -TPR spectra of  $\text{CoS}_y/\text{carbon}$ ,  $c\text{-FeCo}_2\text{S}_y/\text{carbon}$ ,  $c\text{-FeCoS}_y/\text{carbon}$ ,  $c\text{-Fe}_2\text{CoS}_y/\text{carbon}$  products.

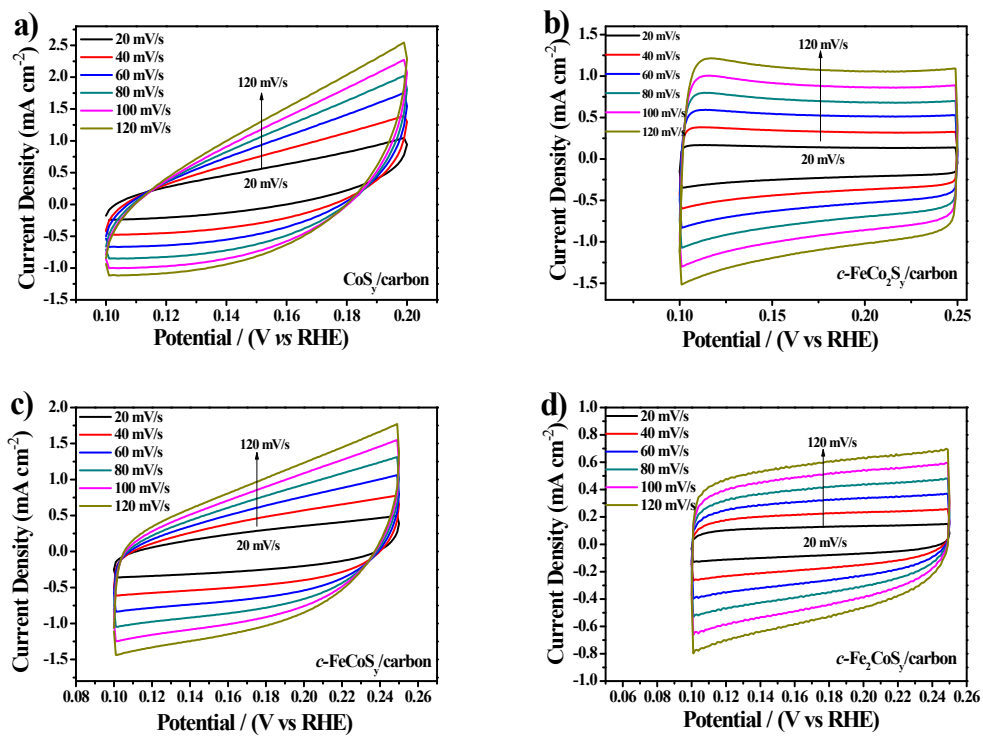

**Figure SI-10.** CV curves of the catalysts with different scanning rates. a) CoS<sub>y</sub>/carbon, b) *c*-FeCo<sub>2</sub>S<sub>y</sub>/carbon, c) *c*-FeCoS<sub>y</sub>/carbon, d) *c*-Fe<sub>2</sub>CoS<sub>y</sub>/carbon.

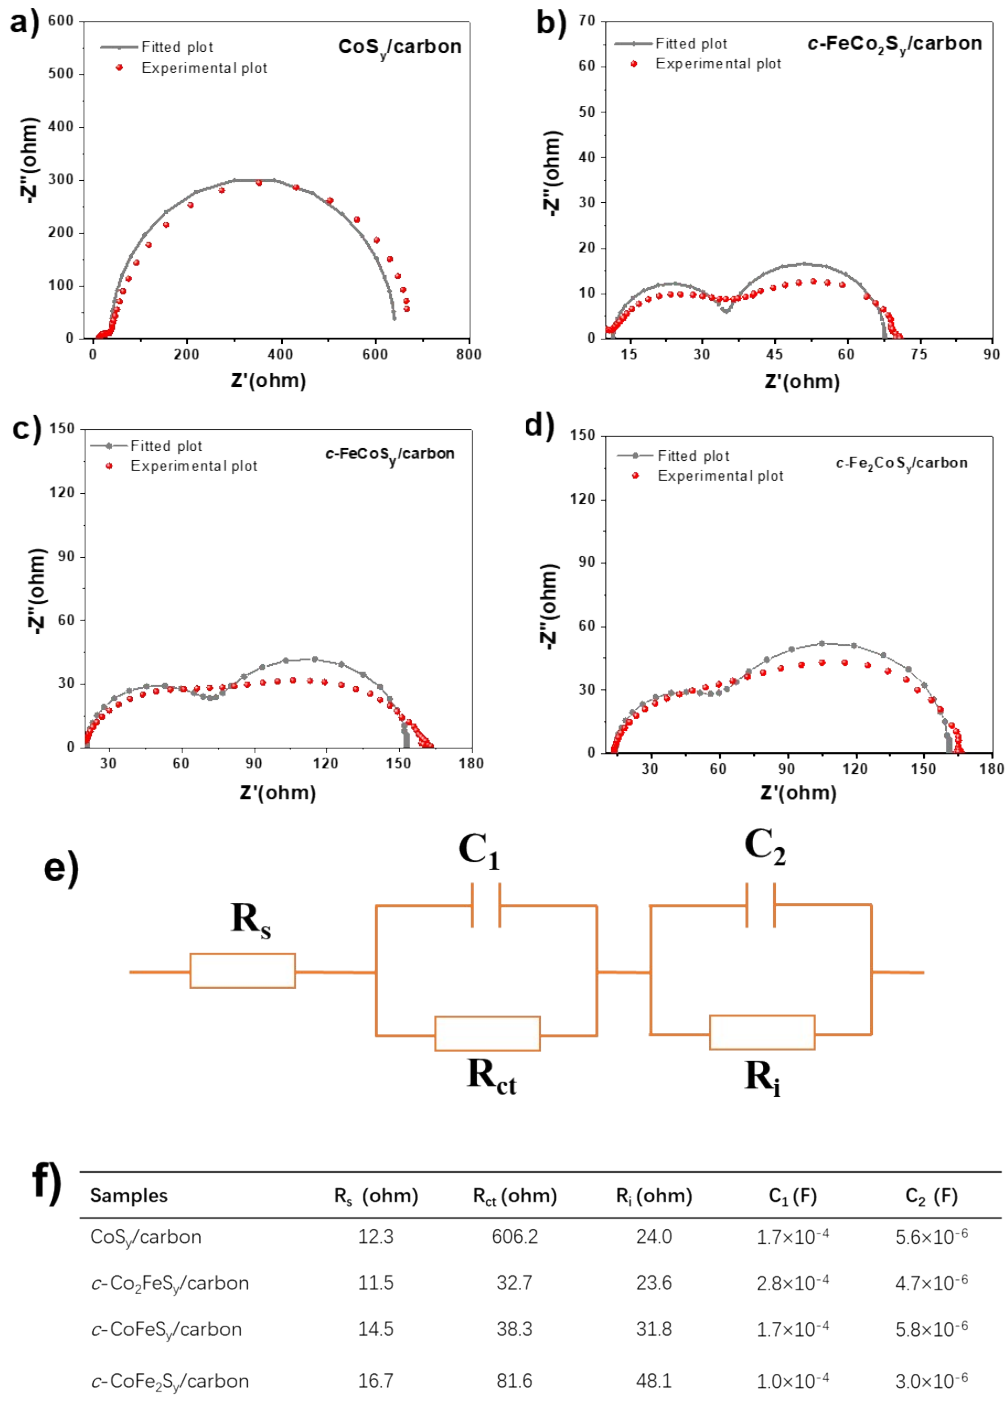

**Figure SI-11.** Nyquist plots with fitted results from the equivalent RC circuit for the products of a)  $\text{CoS}_y/\text{carbon}$ , b)  $c\text{-FeCo}_2\text{S}_y/\text{carbon}$ , c)  $c\text{-FeCoS}_y/\text{carbon}$ , and d)  $c\text{-Fe}_2\text{CoS}_y/\text{carbon}$ . e) Equivalent RC circuit used to fit the plots. f) The fitted results with various resistance values.

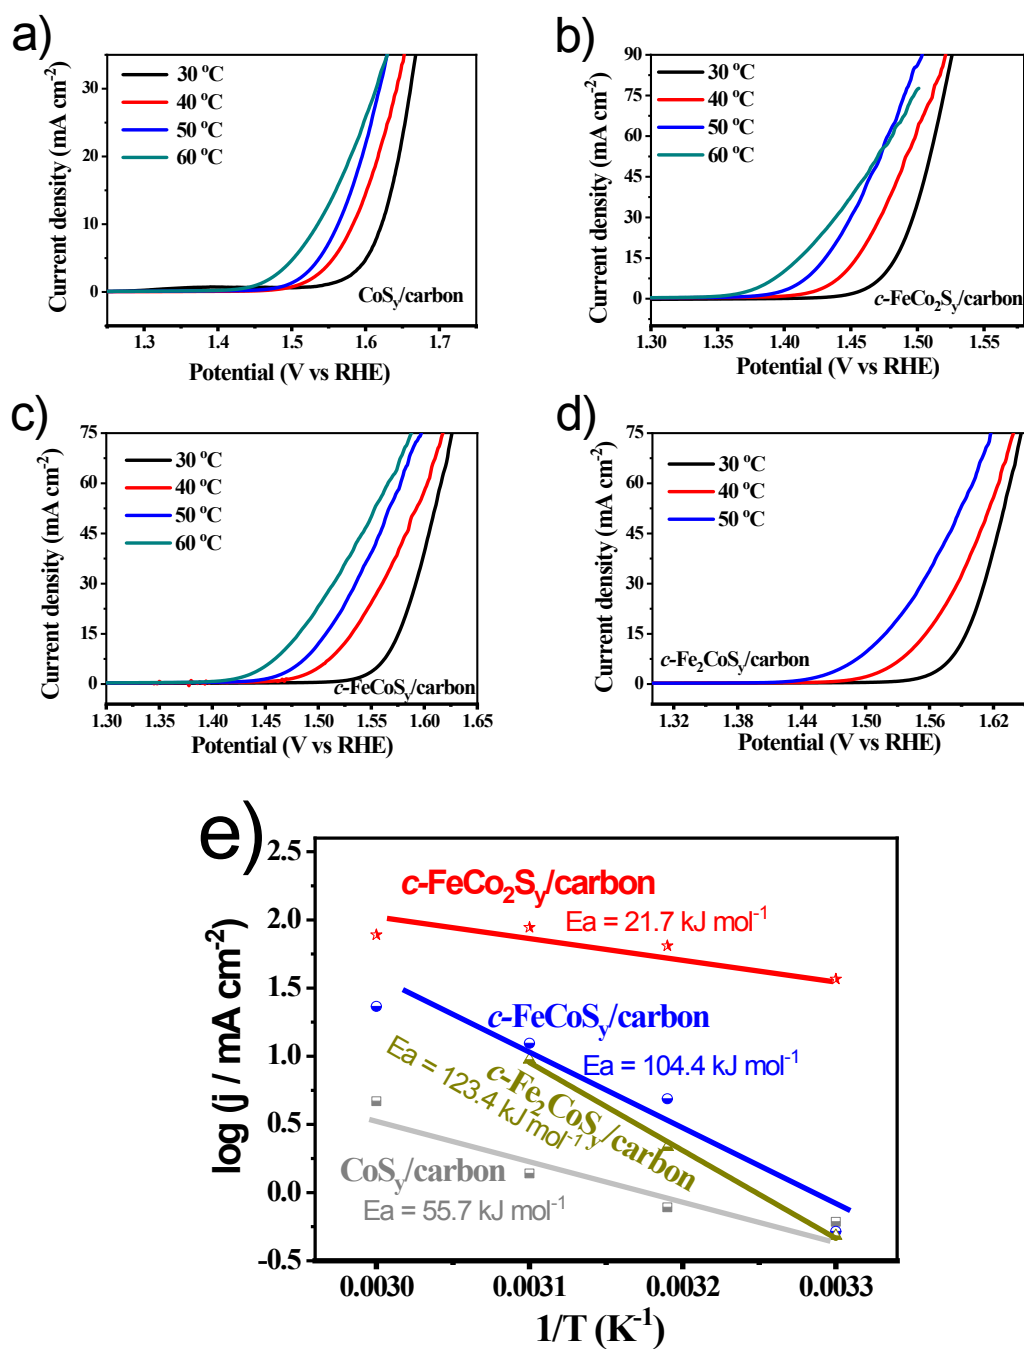

**Figure SI-12.** Polarization curves of the products for OER operated at different temperatures. a)  $\text{CoS}_x/\text{carbon}$ , b)  $c\text{-FeCo}_2\text{S}_y/\text{carbon}$ , c)  $c\text{-FeCoS}_y/\text{carbon}$ , d)  $c\text{-Fe}_2\text{CoS}_y/\text{carbon}$ . e) Arrhenius plots of the kinetic current at  $\eta = 270 \text{ mV}$  without  $iR$  correction.

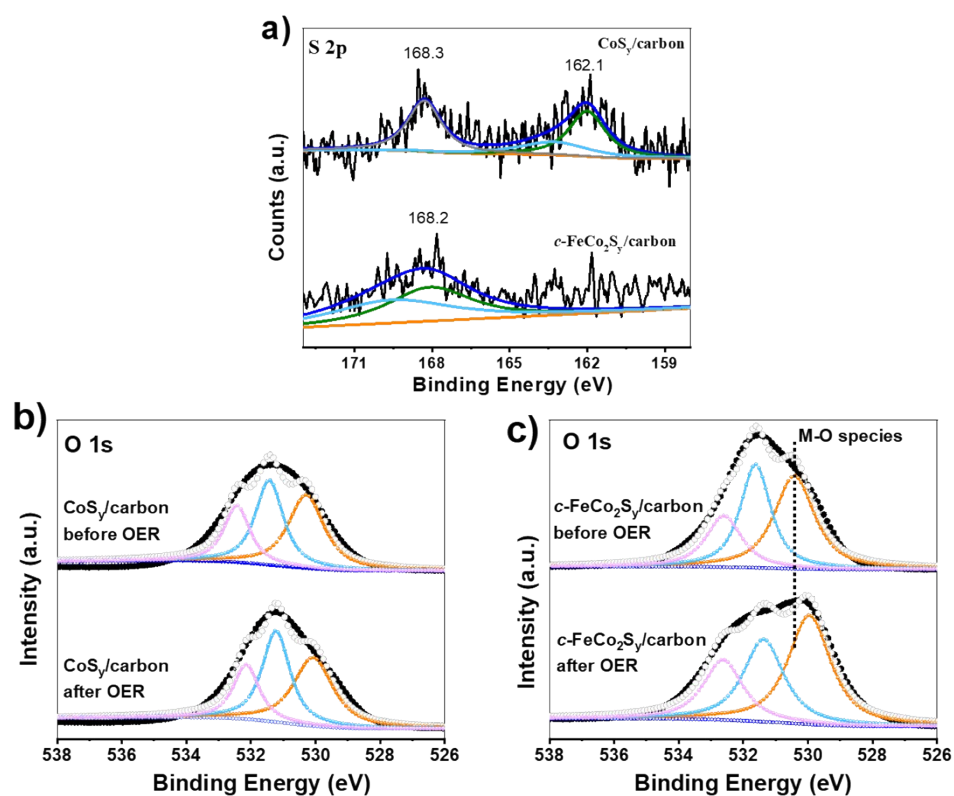

**Figure SI-13.** XPS spectra of a) S 2p region and b) O 1s region in the CoS<sub>y</sub>/carbon and c-FeCo<sub>2</sub>S<sub>y</sub>/carbon products after OER test. For comparison, the O 1s spectra before OER testing were also shown.

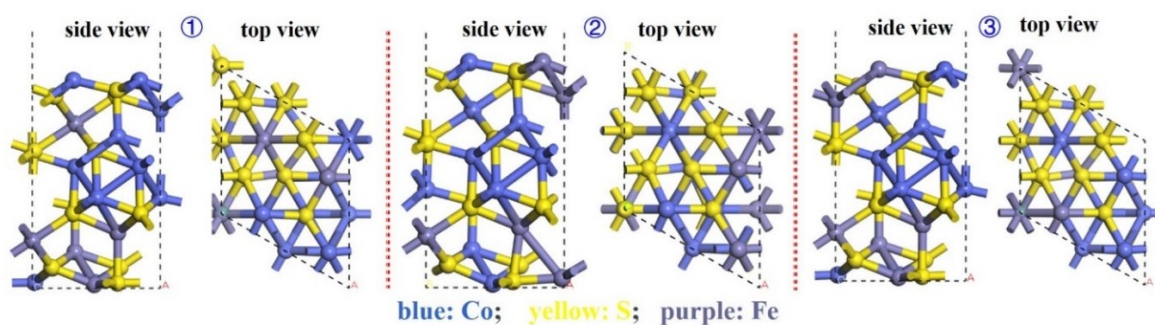

**Figure SI-14.** The top three most stable structures of Fe<sub>6</sub>Co<sub>12</sub>S<sub>16</sub> units (Blue, Co; yellow, S; purple, Fe).

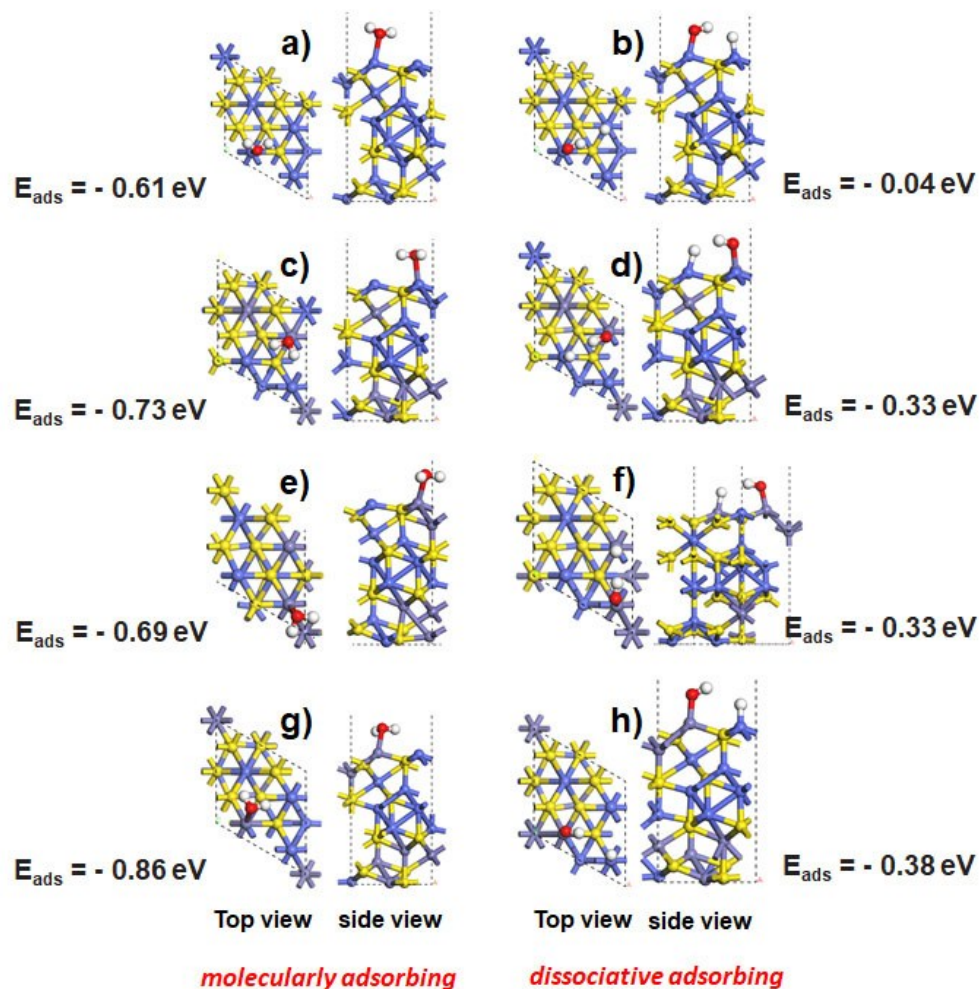

**Figure SI-15.** Optimized structure of water adsorbing model and the corresponding adsorbing energies (blue, Co sites; yellow, S sites; purple, Fe sites). Molecularly adsorbing on a)  $\text{CoS}_y$ , and c) structure ①, e) structure ②, g) structure ③ of  $\text{FeCo}_2\text{S}_y$  clusters. Dissociative adsorbing on b)  $\text{CoS}_y$ , and d) structure ①, f) structure ②, h) structure ③ of  $\text{FeCo}_2\text{S}_y$  clusters.

The possible configuration for water molecular adsorption on metal sulfides was then examined. For  $\text{CoS}_y$ , the result shows that in the most stable adsorption model, the water molecule inclines to adsorbing on a surface cobalt site through its O atom with an adsorption energy of -0.61 eV (Figure SI-15a). Our result also reveals that the water molecule prefers to molecularly adsorbing on the surface, rather than



dissociating into hydroxyl and  $H_{ad}$  (i.e., dissociative adsorption). The latter one presents an adsorption energy of only -0.04 eV (Figure SI-15b).

In contrast, when iron was introduced into the sulfide cluster,  $H_2O$  molecules are found to preferably interact with Fe sites by their O atoms (Figure SI-15). It is reasonable because the electron transfer effect between Fe and S sites induces lower electron density on iron. For example, the adsorption energy of  $H_2O$  on Fe sites of  $Fe_6Co_{12}S_{16}$  clusters is -0.86 eV with the case of molecular adsorption mode (Figure SI-15) on structure ③ of  $FeCo_2S_y$  clusters. The adsorption energy is much bigger than that of  $Co_9S_8$  (-0.61 eV) and is also contrast to the adsorption energy (-0.58 eV) on the Co sites of  $Fe_6Co_{12}S_{16}$  cluster. In the case of dissociative adsorption mode on  $Fe_6Co_{12}S_{16}$  clusters (Figure SI-15h), a hydrogen atom is located on the interfacial Co site, with a hydroxyl staying on the iron sites. The corresponding adsorption energy is -0.38 eV, which are also bigger than that on  $Co_9S_8$  (-0.04 eV) (Figure SI-15b). The above results indicate that on the sulfide surface, the molecular adsorption of water is more thermodynamically favorable than the dissociative adsorption on both of  $CoS_y$  and  $c-FeCo_2S_y$  surface. In addition, these theoretical results indicate that the Fe sites would active for the following catalytic process. Theoretical analysis on another two stable  $Fe_6Co_{12}S_{16}$  clusters also provides similar results (Figure SI-15).

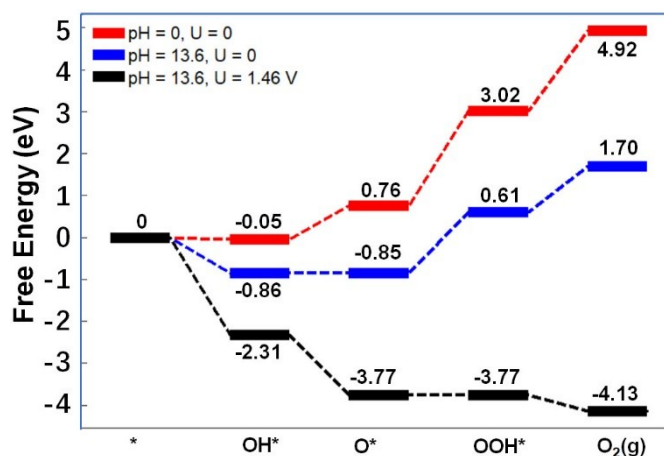

**Figure SI-16.** Full profile of Gibbs free energy for various intermediates in OER process. The theoretical overpotential for the process at pH = 13.6 can be estimated to be  $[0.61 - (-0.85)] - 1.23 = 0.23$  V.

**Table SI-1.** Comparison studies of various typical FeCo-based OER electrocatalysts.

| CoFe-based Materials                                                      | Electrolytes | Substrates   | $\eta$ (mV) for 10 mA cm <sup>-2</sup> | Tafel slope (mV dec <sup>-1</sup> ) | Stability                           | Refs.     |
|---------------------------------------------------------------------------|--------------|--------------|----------------------------------------|-------------------------------------|-------------------------------------|-----------|
| Co <sub>0.5</sub> Fe <sub>0.5</sub> S <sub>x</sub> /N-doped carbon        | 1 M KOH      | GC           | 410                                    | 159                                 | /                                   | 7         |
| Co <sub>0.37</sub> Fe <sub>0.26</sub> S                                   | 1 M KOH      | GC           | 270                                    | 37.2                                | 27.4% current loss after 3 h        | 8         |
| Fe-doped Co <sub>9</sub> S <sub>8</sub>                                   | 1 M KOH      | Ni Foam      | 270                                    | 70                                  | No current loss after 10 h          | 9         |
| Co <sub>0.5</sub> Fe <sub>0.5</sub> Se <sub>2</sub>                       | 1 M KOH      | Carbon fiber | 290                                    | 64                                  | Few current loss after 1000 cycles  | 10        |
| FeSe <sub>2</sub> @CoSe <sub>2</sub> /rGO                                 | 1 M KOH      | GC           | 260                                    | 36                                  | Few current loss after 6 h          | 11        |
| Co <sub>7</sub> Fe-phyate                                                 | 1 M KOH      | GC           | 278                                    | 34                                  | 5.6% current loss after 10 h        | 12        |
| Co <sub>0.54</sub> Fe <sub>0.46</sub> P <sub>x</sub> nanorods             | 0.1 M KOH    | GC           | 370                                    | /                                   | No current loss after 1000 cycles   | 13        |
| CoFe <sub>1.7</sub> P <sub>x</sub>                                        | 1 M KOH      | GC           | 244                                    | 58                                  | No current loss after 10 h          | 14        |
| Co <sub>0.4</sub> Fe <sub>0.28</sub> P                                    | 1 M KOH      | GC           | 270                                    | 26                                  | No current loss after 3 h           | 8         |
| Fe <sub>3</sub> O <sub>4</sub> /Co <sub>3</sub> S <sub>4</sub> nanosheets | 1 M KOH      | GC           | 270                                    | 56                                  | 18% current loss after 24 h         | 15        |
| Fe <sub>3</sub> O <sub>4</sub> /Co <sub>9</sub> S <sub>8</sub> /rGO       | 1 M KOH      | GC           | 320                                    | 54                                  | 12% current loss after 6 h          | 16        |
| Co <sub>2</sub> FeO <sub>4</sub> /rGO                                     | 1 M KOH      | GC           | 340                                    | ~31                                 | No increase of $\eta$ after 4 h     | 17        |
| Reduced CoFe <sub>2</sub> O <sub>4</sub> nanosheets                       | 1 M KOH      | GC           | 320                                    | 48                                  | 9% current loss after 10 h          | 18        |
| Co <sub>2</sub> Fe(OH) <sub>x</sub>                                       | 1 M KOH      | Ni foam      | 300                                    | 83                                  | 20 mV increase of $\eta$ after 20 h | 19        |
| Co <sub>3</sub> Fe(OH) <sub>x</sub> /rGO                                  | 0.1 M KOH    | GC           | 325                                    | 43                                  | No current loss after 10 h          | 20        |
| c-FeCo <sub>2</sub> S <sub>y</sub> /carbon                                | 1 M KOH      | GC           | 247                                    | 35                                  | No obvious current loss after 36 h  | This work |

**Table SI-2.** Bader charge analysis of the top three stable structures of Fe<sub>6</sub>Co<sub>12</sub>S<sub>16</sub> units (positive values mean electron density decrease; negative values mean electron density increase).

|    | structure ① | structure ② | structure ③ | average |
|----|-------------|-------------|-------------|---------|
| Fe | 0.112       | 0.109       | 0.102       | 0.108   |
| Co | -0.007      | 0.006       | 0.008       | 0.001   |
| S  | -0.105      | -0.115      | -0.110      | -0.110  |

**Table SI-3.** Adsorption free energy of OH<sup>-</sup> ( $\Delta G_1$ ) on the Co<sub>9</sub>S<sub>8</sub> units and the top three stable structures of Fe<sub>6</sub>Co<sub>12</sub>S<sub>16</sub> units at different pH values.

| Adsorption free energy of OH <sup>-</sup> ( $\Delta G_1$ ) (eV) | Co <sub>9</sub> S <sub>8</sub> | Structure ① | Structure ② | Structure ③ | Average value of structure ①②③ |
|-----------------------------------------------------------------|--------------------------------|-------------|-------------|-------------|--------------------------------|
| pH = 0 ( $\Delta G_{H^+}(\text{pH})$ equals 0)                  | 0.35                           | -0.16       | 0.14        | -0.05       | -0.023                         |
| pH = 13.6 (experimental conditions)                             | -0.45                          | -0.96       | -0.66       | -0.86       | -0.827                         |

## References:

1. M. Ramos, G. Berhault, D. A. Ferrer, B. Torres and R. R. Chianelli, *Catal. Sci. Techn.*, 2012, **2**, 164-178.
2. Y. P. Liu, Q. J. Li, R. Si, G. D. Li, W. Li, D. P. Liu, D. J. Wang, L. Sun, Y. Zhang and X. X. Zou, *Adv. Mater.*, 2017, **29**, 1606200.
3. J. Zhang, J. Liu, L. Xi, Y. Yu, N. Chen, S. Sun, W. Wang, K. M. Lange and B. Zhang, *J. Am. Chem. Soc.*, 2018, **140**, 3876-3879.
4. M. Bajdich, M. Garcia-Mota, A. Vojvodic, J. K. Norskov and A. T. Bell, *J. Am. Chem. Soc.*, 2013, **135**, 13521-13530.
5. Y. Mao, Z. Wang, H.-F. Wang and P. Hu, *ACS Catal.*, 2016, **6**, 7882-7891.
6. Z. Wang, X. M. Cao, J. Zhu and P. Hu, *J. Catal.*, 2014, **311**, 469-480.
7. M. X. Shen, C. P. Ruan, Y. Chen, C. H. Jiang, K. L. Ai and L. H. Lu, *ACS*

- Appl. Mater. Interf.*, 2015, **7**, 1207-1218.
8. Z. Cao, T. Zhou, W. Xi and Y. Zhao, *Electrochim. Acta*, 2018, **263**, 576-584.
  9. W.-K. Gao, J.-F. Qin, K. Wang, K.-L. Yan, Z.-Z. Liu, J.-H. Lin, Y.-M. Chai, C.-G. Liu and B. Dong, *Appl. Surf. Sci.*, 2018, **454**, 46-53.
  10. J. Q. Chi, X. Shang, W. K. Gao, B. Dong, K. L. Yan, X. Li, Y. R. Liu, Y. M. Chai and C. G. Liu, *Int. J. Hydrogen Energ.*, 2017, **42**, 15189-15195.
  11. G. Zhu, X. Xie, X. Li, Y. Liu, X. Shen, K. Xu and S. Chen, *ACS Appl. Mater. Interf.*, 2018, **10**, 19258-19270.
  12. Y. J. Zhang, T. T. Gao, Z. Y. Jin, X. J. Chen and D. Xiao, *J. Mater. Chem. A*, 2016, **4**, 15888-15895.
  13. A. Mendoza-Garcia, D. Su and S. H. Sun, *Nanoscale*, 2016, **8**, 3244-3247.
  14. T. Zhang, J. Du, P. X. Xi and C. L. Xu, *ACS Appl. Mater. Interf.*, 2017, **9**, 362-370.
  15. J. Du, T. Zhang, J. L. Xing and C. L. Xu, *J. Mater. Chem. A*, 2017, **5**, 9210-9216.
  16. J. Yang, G. X. Zhu, Y. J. Liu, J. X. Xia, Z. Y. Ji, X. P. Shen and S. K. Wu, *Adv. Funct. Mater.*, 2016, **26**, 4712-4721.
  17. J. Geng, L. Kuai, E. J. Kan, Q. Wang and B. Y. Geng, *ChemSusChem*, 2015, **8**, 659-664.
  18. K.-L. Yan, X. Shang, Z.-Z. Liu, B. Dong, S.-S. Lu, J.-Q. Chi, W.-K. Gao, Y.-M. Chai and C.-G. Liu, *Int. J. Hydrogen Energ.*, 2017, **42**, 24150-24158.
  19. L. X. Feng, A. R. Li, Y. X. Li, J. Liu, L. D. Y. Wang, L. Y. Huang, Y. Wang and X. B. Ge, *ChemPlusChem*, 2017, **82**, 483-488.
  20. X. T. Han, C. Yu, J. Yang, C. T. Zhao, H. W. Huang, Z. B. Liu, P. M. Ajayan and J. S. Qiu, *Adv. Mater. Interf.*, 2016, **3**, 1500782.
